# Supplementary material for: Machine Learning-Based Assessment of the Healthy Human Gut Mycobiota Landscape Using ITS1 DNA Metabarcoding Data
Source: Research Square preprint supplement (doi:10.21203/rs.3.rs-7759987/v1), 2026-02-19
Supplement: Supplementary file 1 [file 34572c1a7355f027b1ce9d4e.xlsx]

## Sheet: performances
prevalence	depth	datased	accuracy	precision	recall	f1_score	balanced_accuracy
0	0	train	0.976744	0.96648	1	0.982955	0.964706
0	400	test	0.805869	0.792135	0.959184	0.867692	0.73127
0	100	train	0.975775	0.966434	0.998555	0.982232	0.963983
0.1	900	test	0.805869	0.792135	0.959184	0.867692	0.73127
0	200	train	0.947674	0.929919	0.99711	0.962343	0.922084
0	100	test	0.803612	0.788301	0.962585	0.866769	0.726259
0	300	train	0.973837	0.963738	0.998555	0.980837	0.961042
0	300	test	0.803612	0.785124	0.969388	0.86758	0.722949
0	400	train	0.969961	0.957123	1	0.978092	0.954412
0	600	test	0.799097	0.788732	0.952381	0.862866	0.724513
0	500	train	0.955426	0.940054	0.99711	0.967742	0.933849
0	800	test	0.79684	0.786517	0.952381	0.861538	0.721157
0	600	train	0.985465	0.980142	0.998555	0.989263	0.978689
0.05	200	test	0.79684	0.778689	0.969388	0.863636	0.712882
0	700	train	0.967054	0.95442	0.998555	0.975989	0.950748
0.1	300	test	0.79684	0.784916	0.955782	0.861963	0.719502
0	800	train	0.975775	0.965132	1	0.982257	0.963235
0.05	0	test	0.794582	0.781163	0.959184	0.861069	0.714491
0	900	train	0.956395	0.944979	0.992775	0.968288	0.937564
0.05	700	test	0.794582	0.785915	0.94898	0.859784	0.719456
0.05	0	train	0.968023	0.95574	0.998555	0.976678	0.952219
0	200	test	0.792325	0.777473	0.962585	0.860182	0.70948
0.05	100	train	0.969961	0.957123	1	0.978092	0.954412
0.05	500	test	0.792325	0.782123	0.952381	0.858896	0.714446
0.05	200	train	0.981589	0.973277	1	0.986458	0.972059
0.1	200	test	0.792325	0.788571	0.938776	0.857143	0.721066
0.05	300	train	0.972868	0.961111	1	0.98017	0.958824
0.1	500	test	0.792325	0.780556	0.955782	0.859327	0.71279
0.05	400	train	0.969961	0.957123	1	0.978092	0.954412
0.1	700	test	0.792325	0.782123	0.952381	0.858896	0.714446
0.05	500	train	0.985465	0.978784	1	0.989278	0.977941
0.05	100	test	0.790068	0.778393	0.955782	0.858015	0.709435
0.05	600	train	0.972868	0.961111	1	0.98017	0.958824
0.05	300	test	0.790068	0.781513	0.94898	0.857143	0.712745
0.05	700	train	0.978682	0.971831	0.99711	0.984308	0.969143
0.05	900	test	0.790068	0.778393	0.955782	0.858015	0.709435
0.05	800	train	0.983527	0.978723	0.99711	0.987831	0.976496
0	700	test	0.78781	0.77933	0.94898	0.855828	0.709389
0.05	900	train	0.945736	0.927419	0.99711	0.961003	0.919143
0.05	600	test	0.78781	0.776243	0.955782	0.856707	0.706079
0.1	0	train	0.952519	0.933873	1	0.965806	0.927941
0.05	800	test	0.78781	0.77933	0.94898	0.855828	0.709389
0.1	100	train	0.967054	0.956944	0.995665	0.975921	0.952244
0.1	0	test	0.78781	0.774725	0.959184	0.857143	0.704424
0.1	200	train	0.963178	0.949176	0.998555	0.973239	0.944866
0.1	600	test	0.78781	0.780899	0.945578	0.855385	0.711044
0.1	300	train	0.969961	0.959666	0.99711	0.97803	0.955908
0	500	test	0.785553	0.777159	0.94898	0.854518	0.706033
0.1	400	train	0.975775	0.967742	0.99711	0.982206	0.964731
0.1	800	test	0.785553	0.775623	0.952381	0.854962	0.704378
0.1	500	train	0.967054	0.955679	0.99711	0.975955	0.951496
0.1	400	test	0.781038	0.779037	0.935374	0.850077	0.705942
0.1	600	train	0.967054	0.958217	0.99422	0.975887	0.952992
0.1	100	test	0.778781	0.775281	0.938776	0.849231	0.700931
0.1	700	train	0.962209	0.949106	0.99711	0.972516	0.944143
0	0	test	0.774266	0.767956	0.945578	0.847561	0.69091
0.1	800	train	0.978682	0.970506	0.998555	0.98433	0.968395
0	900	test	0.769752	0.766667	0.938776	0.844037	0.687509
0.1	900	train	0.976744	0.967787	0.998555	0.98293	0.965454
0.05	400	test	0.767494	0.769014	0.928571	0.841294	0.689118
